# Supplementary material
Source: PubMed Central journal article supplement (PMC4415009)
Supplement: supp_fj.14-258533_Supplemental_Data2.pdf [file supp_fj.14-258533_Supplemental_Data2.pdf]

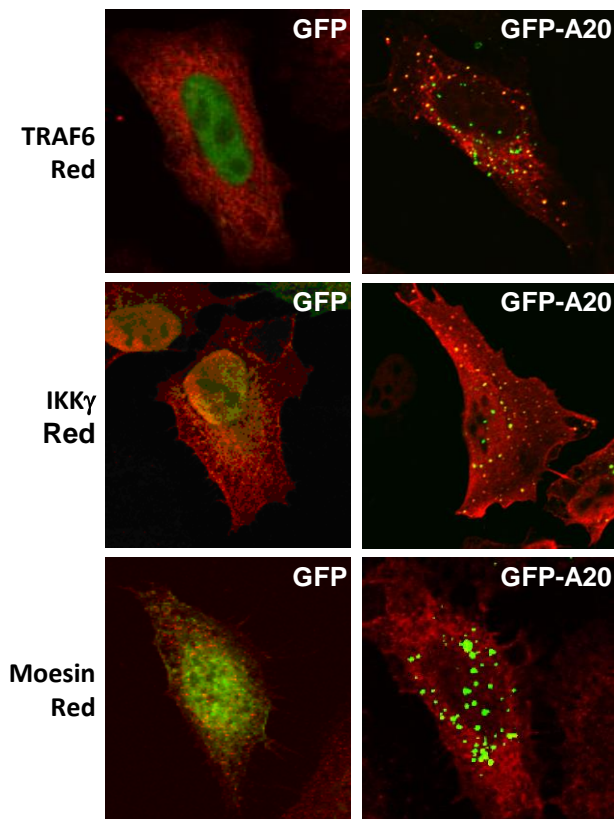

**Supplementary Figure 3  
A20 targets inflammatory signalling proteins to punctate structures.**

HEK293 cells were co-transfected with either GFP-A20 or empty GFP vector together with FLAG-IKK $\gamma$ , FLAG-TRAF6 or HA-moesin. Intracellular localisation of signaling molecules (red) was assessed by immunostaining using anti-FLAG or anti-HA antibodies followed by confocal microscopy. Images shown are representative of three closely similar experiments.

**Supplementary Table**

| Target       | Proportion of cells containing punctate target proteins |             |
|--------------|---------------------------------------------------------|-------------|
|              | GFP empty                                               | GFP - A20   |
| TRAF2        | 58 $\pm$ 2%                                             | 88 $\pm$ 2% |
| RIP          | 0%                                                      | 53 $\pm$ 7% |
| TRAF6        | 0%                                                      | 80 $\pm$ 2% |
| IKK $\gamma$ | 0%                                                      | 61 $\pm$ 3% |
| IKK $\beta$  | 0%                                                      | 0%          |
| meosin       | 0%                                                      | 0%          |
