# Supplementary material
Source: PubMed Central journal article supplement (PMC4415009)
Supplement: supp_fj.14-258533_Supplemental_Figure3.pdf [file supp_fj.14-258533_Supplemental_Figure3.pdf]

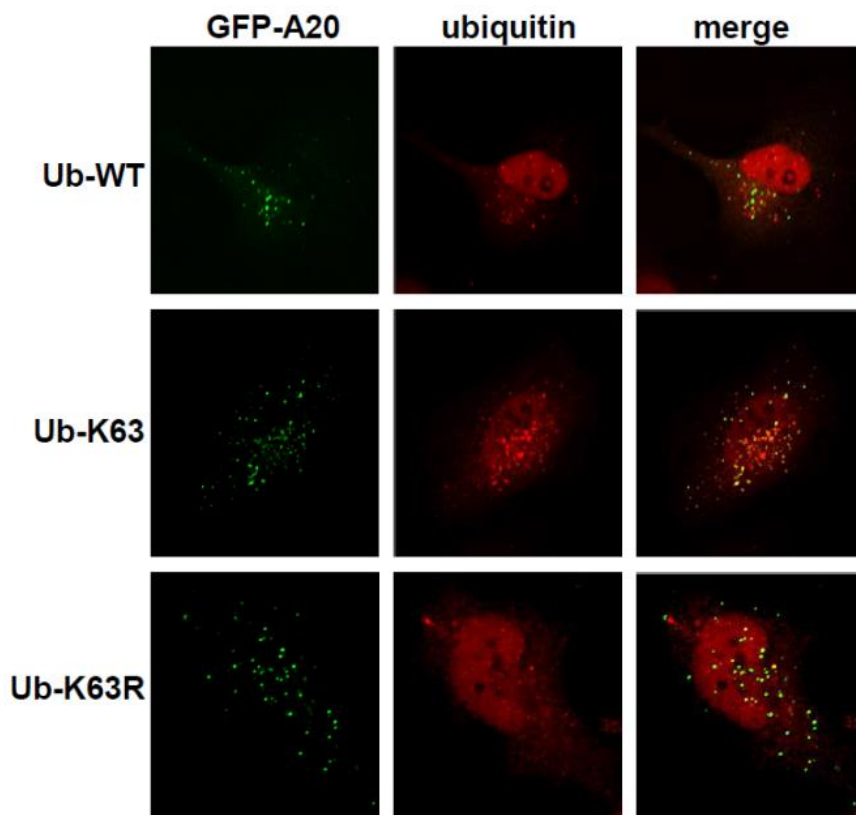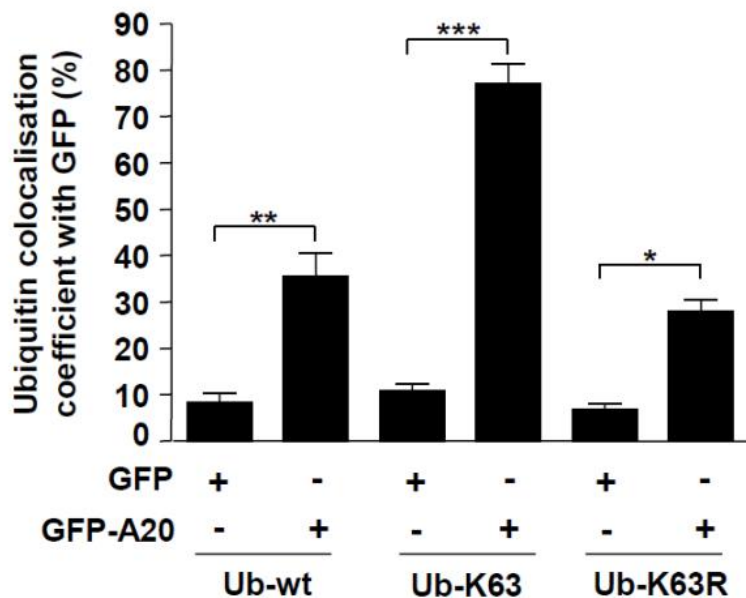

**Supplementary Figure 4 A20 aggresomes co-localise with K63 polyubiquitin.**

HeLa cells were co-transfected with pEGFP-A20 together with pHM6-Ub-wt, pHM6-Ub-K63 or pHM6-Ub-K63R. The intracellular localisation of ubiquitin was assessed by immunofluorescence staining using anti-HA antibodies (red). Images shown are representative of two closely similar experiments. Lower panel, co-localisation coefficients calculated from 30 cells were pooled from two experiments and are reported as mean  $\pm$  standard deviations.
