# Supplementary material
Source: PubMed Central journal article supplement (PMC4415009)

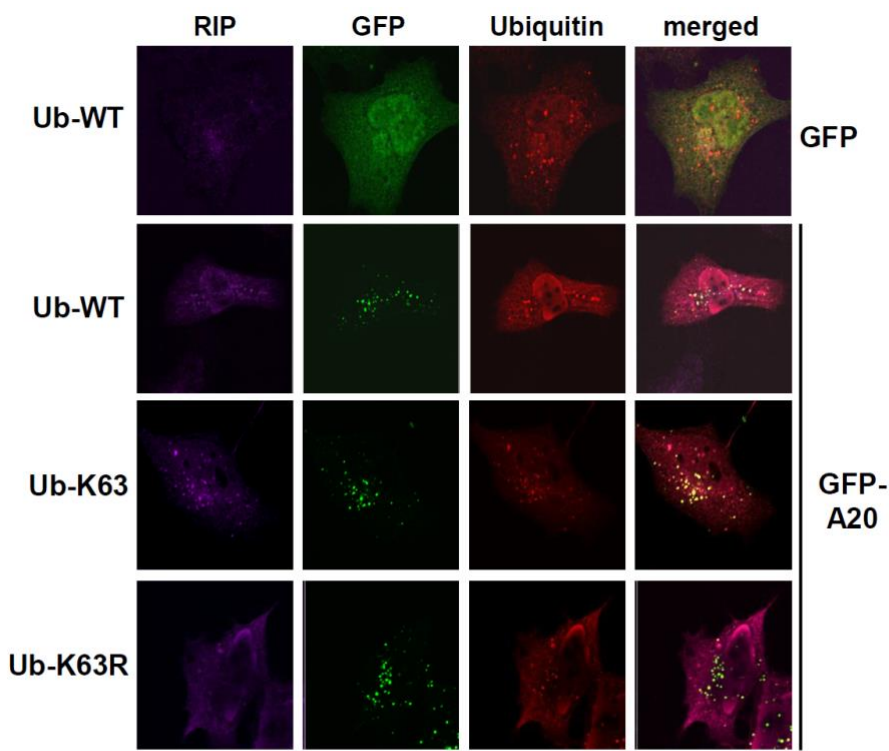

**Supplementary Figure 5**  
**K63 polyubiquitin**  
**promotes RIP1/A20 co-**  
**localisation.**

HeLa cells were co-transfected with GFP-A20 (or with GFP alone as a control), E-RIP and a HA-tagged version of wild-type ubiquitin (Ub-wt), Ub-K63 or Ub-K63R. The intracellular localisation of signalling molecules was assessed by immunofluorescent staining using anti-E (purple) and anti-HA (red) antibodies. Representative images are shown. Co-localisation coefficients were calculated from 30 cells using Carl Zeiss software. Data pooled from two experiments are shown as mean values  $\pm$  standard deviations.

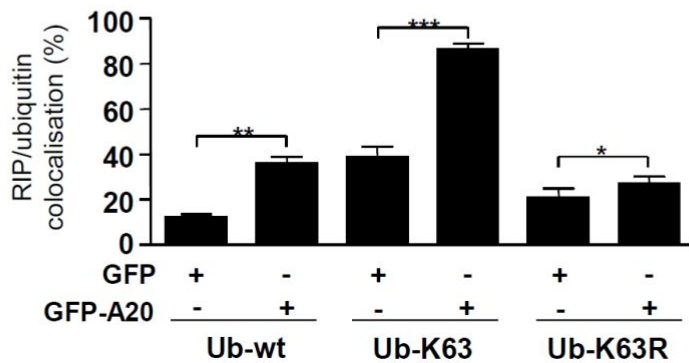

**Supplementary Figure 6**

**Model of the ubiquitin editing (left) and aggresome-dependent (right) mechanisms used by A20 to inhibit RIP signalling.**

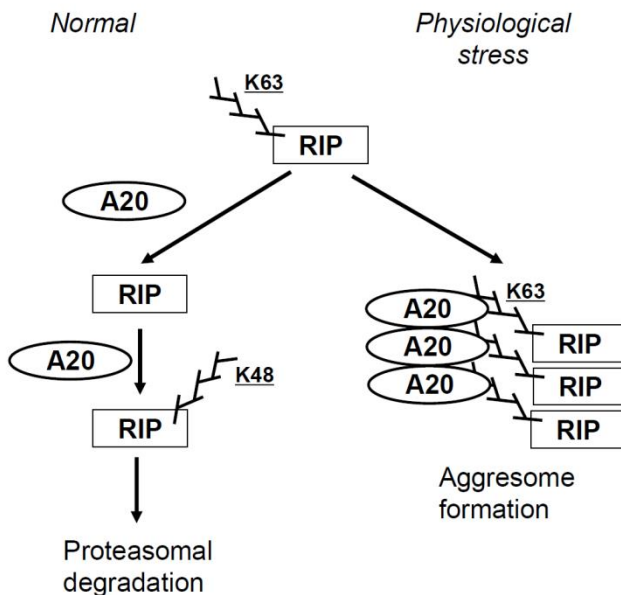

Supplement: supp_fj.14-258533_Supplemental_Figures4.pdf [file supp_fj.14-258533_Supplemental_Figures4.pdf]
